# Supplementary material for: The impact of obstructive apnea sleep syndrome on chemical function
Source: Springer Nature journal article supplement (doi:10.1007/s11325-020-02022-3), 2020-02-08
Supplement: MOESM1 [file 17662430]

Table S1 Descriptive statistics of MoCA scores

| Variables | Snoring group  (n=5) | Mild to moderate OSAS group (n=11) | Severe OSAS group (n=16) | P Value |
| --- | --- | --- | --- | --- |
| MoCA total score | 26.8 ± 0.8 | 25.1 ± 2.7 | 23.2 ± 2.2 | 0.009＊ |
| Visuospatial/  Executive abilities | 4.2 ± 0.4 | 3.7 ± 1.1 | 3.6 ± 1.0 | 0.535 |
| Naming | 2.8 ± 0.4 | 2.5 ± 0.7 | 2.6 ± 0.5 | 0.681 |
| Attention digits | 2.0 ± 0.0 | 2.0 ± 0.0 | 2.0 ± 0.0 | 1.000 |
| Attention letters | 1.0 ± 0.0 | 0.9 ± 0.3 | 0.8 ± 0.4 | 0.522 |
| Attention subtraction | 2.6 ± 0.5 | 2.7 ± 0.6 | 2.5 ± 0.6 | 0.655 |
| Language repeat | 1.8 ± 0.4 | 1.6 ± 0.5 | 1.4 ± 0.5 | 0.322 |
| Language fluency | 1.0 ± 0.0 | 0.9 ± 0.3 | 0.8 ± 0.4 | 0.331 |
| Abstraction | 1.8 ± 0.4 | 1.7 ± 0.5 | 1.3 ± 0.5 | 0.043＊ |
| Delayed recall | 3.6 ± 0.5 | 3.0 ± 1.0 | 2.3 ± 1.2 | 0.043＊ |
| Orientation | 6.0 ± 0.0 | 5.9 ± 0.3 | 5.9 ± 0.3 | 0.801 |

*Statistically significant
